# Supplementary material for: The exposure of autoantigens by microparticles underlies the formation of potent inflammatory components: the microparticle-associated immune complexes
Source: PubMed Central journal article supplement (PMC3569640; doi:10.1002/emmm.201201846), 2012-12-11
Supplement: emmm0005-0235-SD2.pdf [file emmm0005-0235-SD2.pdf]

## **Supplementary material**

### **The exposure of autoantigens by microparticles underlies the formation of potent inflammatory components: the microparticle-associated immune complexes**

Nathalie Cloutier<sup>1</sup>, Sisareuth Tan<sup>2</sup>, Luc H. Boudreau<sup>1</sup>, Catriona Cramb<sup>3</sup>, Roopashree Subbaiah<sup>4</sup>, Lauren Lahey<sup>3</sup>, Alexandra Albert<sup>1</sup>, Ruslan Shnayder<sup>5</sup>, Reuben Gobezie<sup>6</sup>, Peter A. Nigrovic<sup>5,7</sup>, Richard W. Farndale<sup>8</sup>, William H. Robinson<sup>3</sup>, Alain Brisson<sup>2</sup>, David M. Lee<sup>5,9</sup> and Eric Boilard<sup>1</sup>

### **Table of contents**

|                        |   |
|------------------------|---|
| Supplementary Figure 1 | 2 |
| Supplementary Figure 2 | 3 |
| Supplementary Table 1  | 4 |
| Supplementary Table 2  | 5 |

**Supplementary Figure 1**

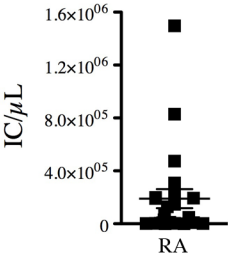

**Supplementary Figure 1. Quantification of ICs detected in RA SF.** Flow cytometric quantifications of the total IgG<sup>+</sup> ICs in RA SF (*n* = 23). Data are mean ± SEM.

## Supplementary Figure 2

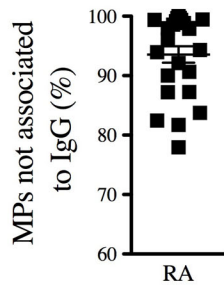

**Supplementary Figure 2. Quantification of the MPs not associated to IgG in RA SF.** Flow cytometric quantifications of the Annexin-V<sup>+</sup> MPs not associated to IgG in RA SF ( $n = 23$ ). Data are mean  $\pm$  SEM.

**Supplementary Table 1.** List of antigens evaluated by Bio-Plex™ bead based antigen array

|                                             |                                          |
|---------------------------------------------|------------------------------------------|
| Apolipoprotein A1                           | Fibrinogen A (556-575 cit sm cyclic)     |
| Apolipoprotein A1 cit                       | Fibrinogen A (616-635 cit3 cyclic)       |
| Apolipoprotein E                            | Fibrinogen A (616-635 cit3 small cyclic) |
| Apolipoprotein E cit                        | Fibrinogen A1 (616-635 cit3)             |
| Apolipoprotein E (277-296 cit2 sm1 cyclic)  | Fibrinogen A2 (41-60 cit3)               |
| Apolipoprotein E (277-296 cit2 sm2 cyclic ) | Fibrinogen A10 (556-575 cit)             |
| Biglycan (247-266 cit sm-1 cyclic)          | Fibrinogen B (60-74 cit cyclic small-2)  |
| CCP                                         | Filaggrin (48-75 cit2v2 cyclic)          |
| Cfc (48-65 cit cyclic)                      | Filaggrin (48-65 cit2 v1 cyclic)         |
| Cfc (48-65 cit1)                            | Filaggrin 1 (48-65 cit2v1)               |
| Clusterin (221-240 cit cyclic)              | Filaggrin 2 (48-65 cit2v2)               |
| Clusterin (231-250 cit sm-1 cyclic)         | H2A/a (1-20 cit sm-2 cyclic)             |
| Clusterin (231-250 cit sm-2 cyclic)         | H2A/a-2 (1-20 cit)                       |
| Clusterin-5 (231-250 cit)                   | H2B/a (62-81 cit cyclic)                 |
| Collagen pC11 (Cit1 cyclic)                 | Histones 2B                              |
| Enolase 1A (5-21 cit)                       | Histones 2B cit                          |
| Enolase 1A (cyclic)                         | HSP60                                    |
| Enolase 1B (5-21 cit)                       | Vimentin                                 |
| Fibrinogen A                                | Vimentin cit                             |
| Fibrinogen A cit                            | Vimentin (58-77 cit3 cyclic small-1)     |

**Supplementary Table 2.** List of the RA canonical antigens evaluated by mass spectrometry

|                   |                |
|-------------------|----------------|
| Apolipoprotein A1 | Fibrinogen A2  |
| Apolipoprotein E  | Fibrinogen A10 |
| Biglycan          | Fibrinogen B   |
| CCP               | Filaggrin      |
| Cfc               | Filaggrin 1    |
| Clusterin         | Filaggrin 2    |
| Clusterin-5       | Histone 2A/a   |
| Collagen pC11     | Histone 2A/a-2 |
| Enolase 1A        | Histone 2B/a   |
| Enolase 1B        | Histone 2B     |
| Fibrinogen A      | HSP60          |
| Fibrinogen A1     | Vimentin       |
